# Supplementary material
Source: PubMed Central journal article supplement (PMC6367717)
Supplement: NIHMS1000675-supplement-S-table.pdf [file NIHMS1000675-supplement-S-table.pdf]

| Strain                       | Common name           | Stock # |                                                                                                                         |
|------------------------------|-----------------------|---------|-------------------------------------------------------------------------------------------------------------------------|
| C57BL/6J                     | C57BL/6               | 000664  | Express the AhR <sup>b</sup> allele and are sensitive to TCDD-induced toxicity at 10 µg/kg                              |
| B6.D2N-Ahrd/J                | AhR <sup>d</sup>      | 002921  | Express the AhR <sup>d</sup> allele and are sensitive to TCDD-induced toxicity at 100 µg/kg                             |
| B6Smn.C3-Faslgld/J           | Gld                   | 0010210 | Unable to express functional Fas Ligand                                                                                 |
| B6.129P2-Lyz2tm1(cre)lfo/J   | LyzM <sup>Cre</sup>   | 004781  | Allow for targeted deletion of the AhR in cells of the myeloid lineage: monocytes, mature macrophages, and granulocytes |
| B6.Cg-Tg(Itgax-cre)1-1Reiz/J | CD11c <sup>Cre</sup>  | 008068  | Allow for targeted deletion of the AhR in cells of the dendritic lineage: conventional and plasmacytoid dendritic cells |
| B6(Cg)-Foxn1tm3(cre)Nrm/J    | Foxn1 <sup>Cre</sup>  | 018448  | Allow for targeted deletion of the AhR in thymic epithelial cells and keratinocytes.                                    |
| B6.FVB-Tg(Rorc-cre)1Litt/J   | ROR <sup>yt</sup> Cre | 022791  | Allow for targeted deletion of the AhR in DP thymocytes and their SP progeny.                                           |
| Ahrtm3.1Bra/J                | AhR <sup>flox</sup>   | 006203  | Use to generate cell/tissue-specific mutants of the aryl-hydrocarbon receptor (AhR)                                     |
