# Supplementary material
Source: PubMed Central journal article supplement (PMC6367717)

**A.**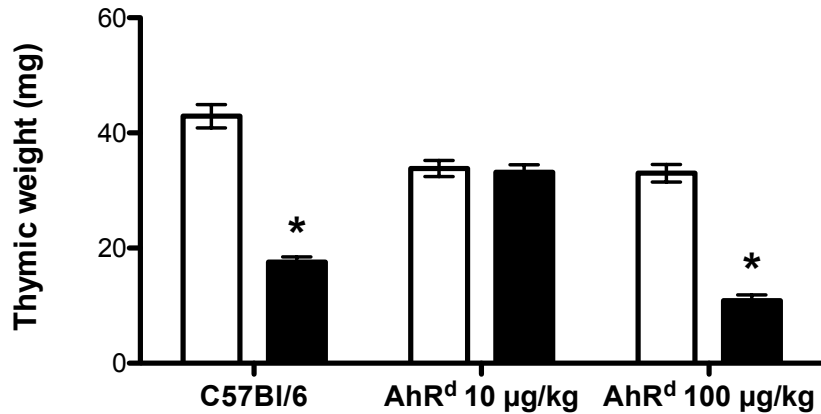**B.**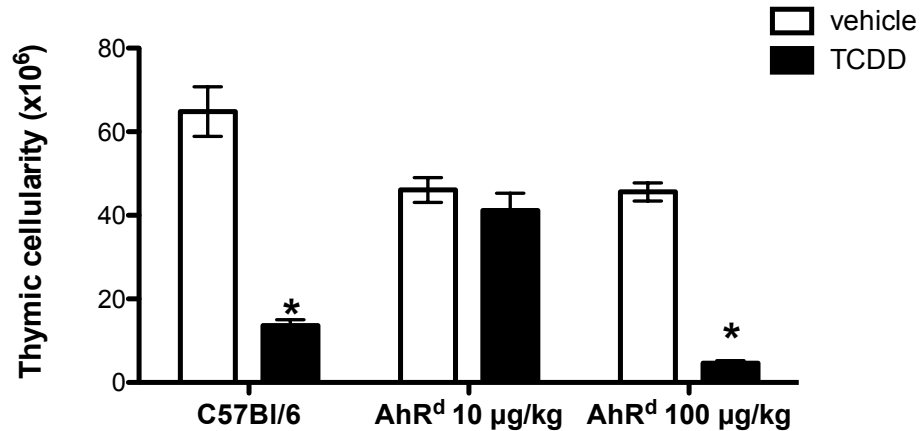

Supplement: NIHMS1000675-supplement-S1.pdf [file NIHMS1000675-supplement-S1.pdf]

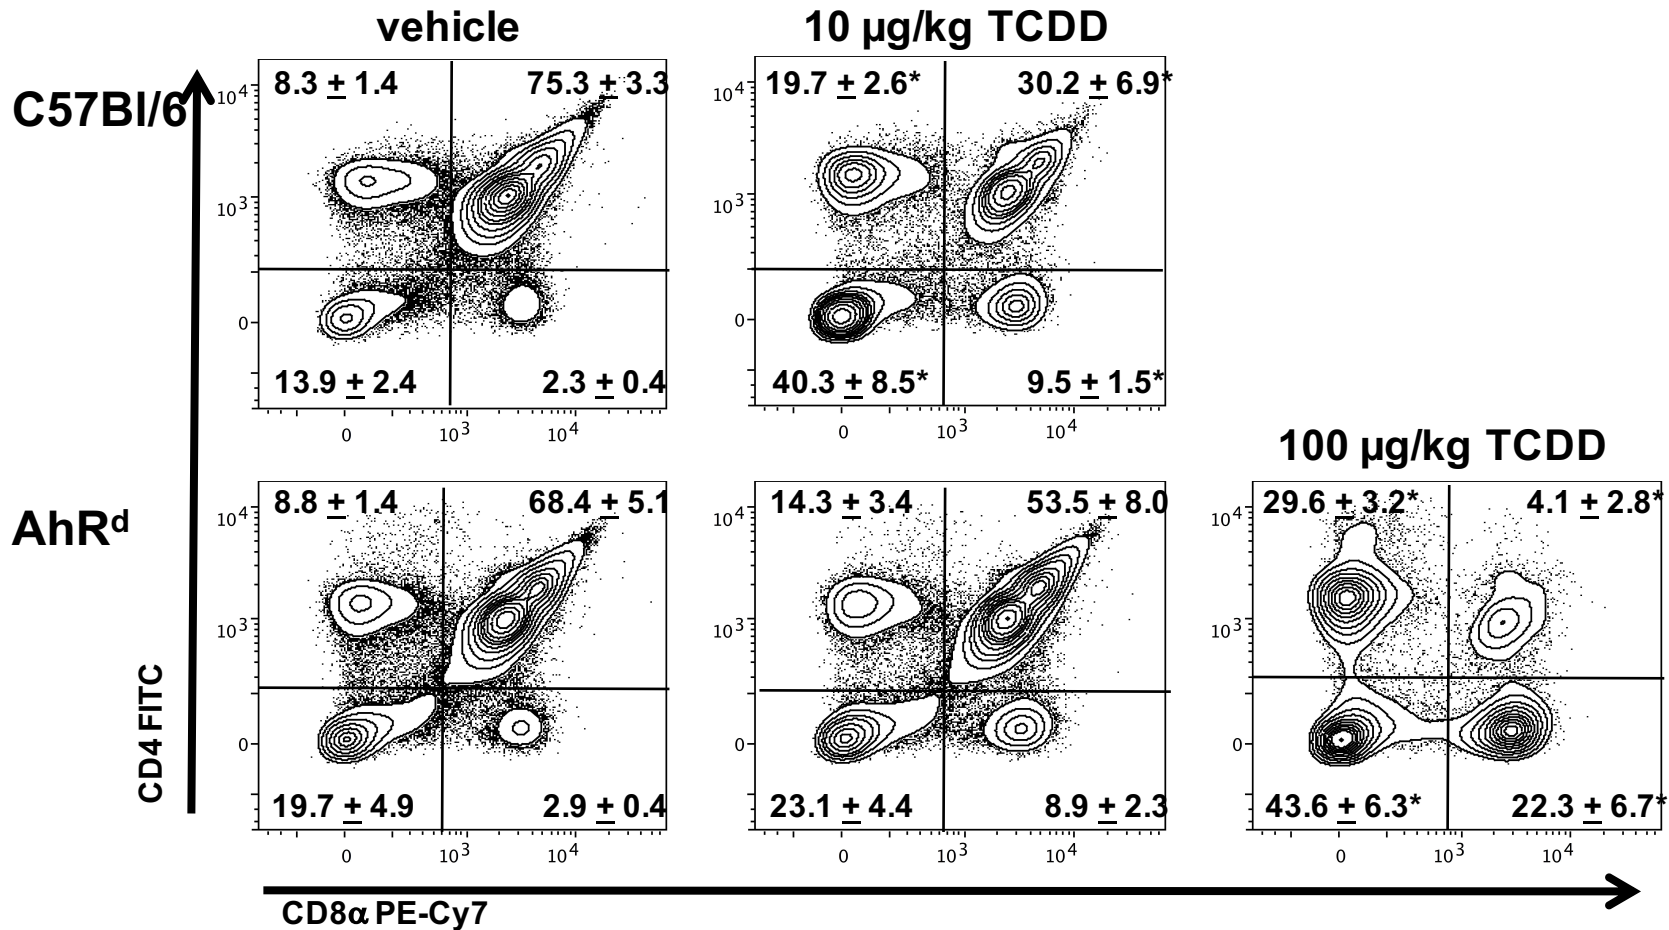

Supplement: NIHMS1000675-supplement-S2.pdf [file NIHMS1000675-supplement-S2.pdf]

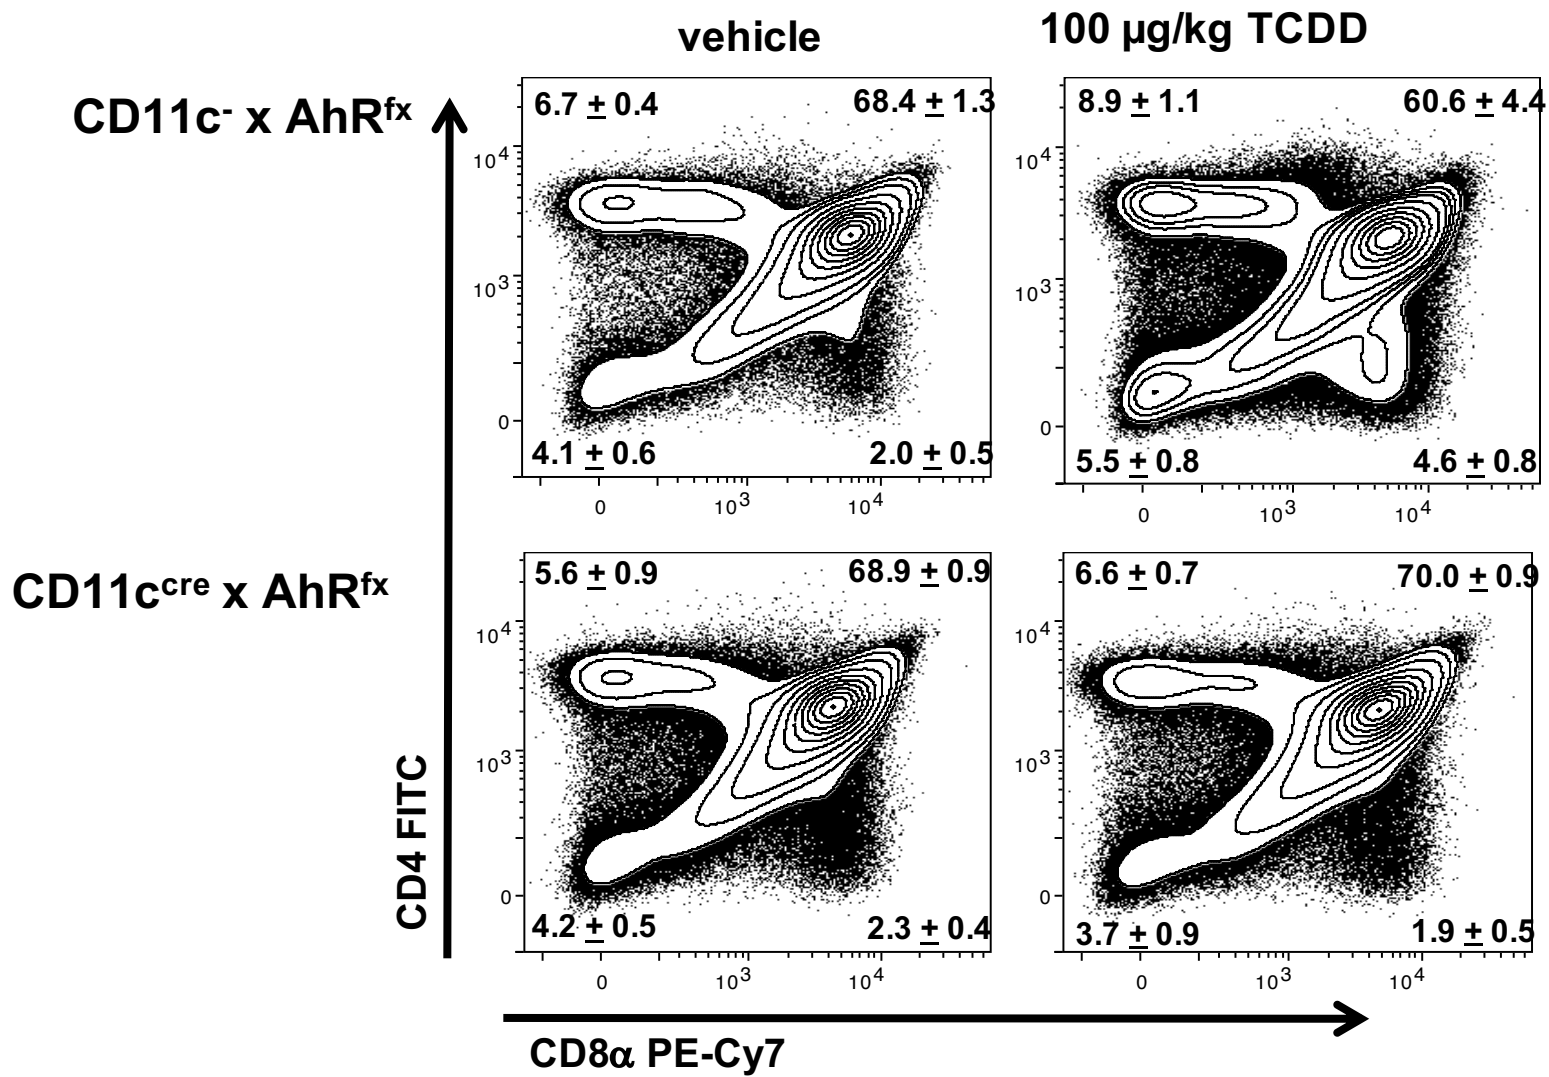

Supplement: NIHMS1000675-supplement-S3.pdf [file NIHMS1000675-supplement-S3.pdf]
